# Supplementary material
Source: Springer Nature journal article supplement (https://www.springermedizin.de/resource/supplementary/13098_2009_69_MOESM1_ESM.pdf/9670446)

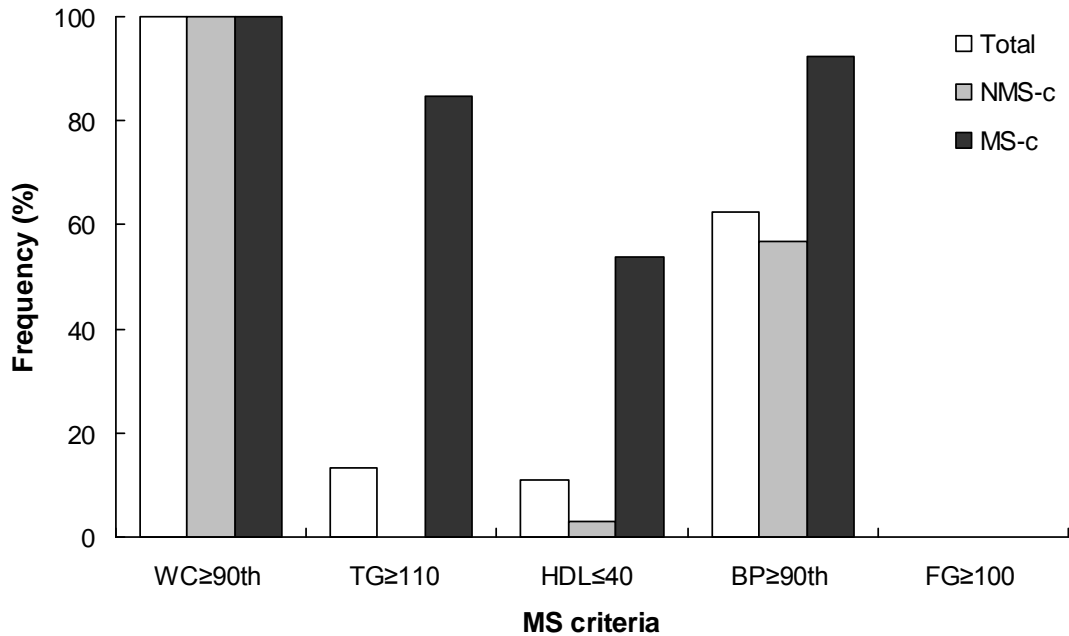

Supplement: MOESM1 [file 9670446]
